# Supplementary material for: Clinical Characteristics of Peripheral Neuropathy in Kenyan Patients with HIV Infection Compared with Patients with Concurrent HIV Infection and Diabetes Mellitus
Source: PubMed Central journal article supplement — Diabetes Ther. 2022 Feb 14;13(3):441–51. doi: 10.1007/s13300-022-01205-3 (PMC8934803; doi:10.1007/s13300-022-01205-3), 2022-02-14
Supplement: 13300_2022_1205_MOESM1_ESM.pdf [file 13300_2022_1205_MOESM1_ESM.pdf]

## **Clinical Characteristics of Peripheral Neuropathy in Kenyan Patients with HIV Infection Compared with Patients with Concurrent HIV Infection and Diabetes Mellitus**

Werimo Pascal Kuka<sup>1</sup>, Jasmit Shah<sup>1</sup>, Uazman Alam<sup>2,3</sup>, Dilraj Singh Sokhi<sup>1</sup>, Reena Shah<sup>1</sup>

<sup>1</sup>Department of Medicine, Aga Khan University Medical College East Africa, Nairobi, Kenya

<sup>2</sup>Division of Endocrinology, Diabetes and Gastroenterology, University of Manchester, Manchester, UK

<sup>3</sup>Diabetes & Endocrinology Research, Institute of Life Course and Medical Sciences and the Pain Research Institute, University of Liverpool and Liverpool University Hospital NHS Foundation Trust, Liverpool, UK.

Corresponding author: Werimo Pascal Kuka ([wpkuka@yahoo.com](mailto:wpkuka@yahoo.com))

Neuropathy Disability Score and Monofilament Test results

| Neuropathy Disability                 |                             | Total |       | HIV Only |        | HIV and DM |       | p value |
|---------------------------------------|-----------------------------|-------|-------|----------|--------|------------|-------|---------|
| Right Vibration Perception Threshold  | Normal                      | 135   | 99.3% | 68       | 100.0% | 67         | 98.5% | 1       |
|                                       | Abnormal                    | 1     | 0.7%  | 0        | 0.0%   | 1          | 1.5%  |         |
| Right Temperature Perception          | Normal                      | 129   | 96.3% | 68       | 100.0% | 61         | 92.4% | 0.027   |
|                                       | Abnormal                    | 5     | 3.7%  | 0        | 0.0%   | 5          | 7.6%  |         |
| Right Pin-Prick                       | Normal                      | 128   | 94.1% | 65       | 95.6%  | 63         | 92.6% | 0.718   |
|                                       | Abnormal                    | 8     | 5.9%  | 3        | 4.4%   | 5          | 7.4%  |         |
| Right Achilles Reflex                 | Present                     | 101   | 74.8% | 56       | 82.4%  | 45         | 67.2% | 0.006   |
|                                       | Present with reinforcement  | 13    | 9.6%  | 8        | 11.8%  | 5          | 7.5%  |         |
|                                       | Absent                      | 21    | 15.6% | 4        | 5.9%   | 17         | 25.4% |         |
| Left Vibration Perception Threshold   | Normal                      | 133   | 97.8% | 68       | 100.0% | 65         | 95.6% | 0.244   |
|                                       | Abnormal                    | 3     | 2.2%  | 0        | 0.0%   | 3          | 4.4%  |         |
| Left Temperature Perception           | Normal                      | 129   | 95.6% | 68       | 100.0% | 61         | 91.0% | 0.013   |
|                                       | Abnormal                    | 6     | 4.4%  | 0        | 0.0%   | 6          | 9.0%  |         |
| Left Pin-Prick                        | Normal                      | 126   | 92.6% | 66       | 97.1%  | 60         | 88.2% | 0.096   |
|                                       | Abnormal                    | 10    | 7.4%  | 2        | 2.9%   | 8          | 11.8% |         |
| Left Achilles Reflex                  | Present                     | 94    | 69.6% | 52       | 76.5%  | 42         | 62.7% | 0.047   |
|                                       | Present with reinforcement  | 16    | 11.9% | 9        | 13.2%  | 7          | 10.4% |         |
|                                       | Absent                      | 25    | 18.5% | 7        | 10.3%  | 18         | 26.9% |         |
| Neuropathy Disability Score           | mean (SD)                   | 1.13  | 1.86  | 0.65     | 1.27   | 1.62       | 2.21  | 0.008   |
|                                       | No Disability               | 93    | 68.4% | 52       | 76.5%  | 41         | 60.3% | 0.032   |
|                                       | Disability                  | 43    | 31.6% | 16       | 23.5%  | 27         | 39.7% |         |
| Right Foot Monofilament Testing Score | Normal                      | 130   | 95.6% | 65       | 95.6%  | 65         | 95.6% | 1       |
|                                       | Abnormal                    | 6     | 4.4%  | 3        | 4.4%   | 3          | 4.4%  |         |
| Left Foot Monofilament Testing Score  | Normal                      | 130   | 95.6% | 66       | 97.1%  | 64         | 94.1% | 0.680   |
|                                       | Abnormal                    | 6     | 4.4%  | 2        | 2.9%   | 4          | 5.9%  |         |
| Neuropathy Prevalence                 | Normal                      | 77    | 56.6% | 40       | 58.8%  | 37         | 54.4% | 0.729   |
|                                       | Symptoms only; no signs     | 16    | 11.8% | 12       | 17.6%  | 4          | 5.9%  | 0.06    |
|                                       | Asymptomatic; signs present | 15    | 11.0% | 5        | 7.4%   | 10         | 14.7% | 0.273   |
|                                       | Neuropathy                  | 28    | 20.6% | 11       | 16.2%  | 17         | 25.0% | 0.289   |
